# Supplementary material
Source: publisher figshare collection journal article supplement (https://acs.figshare.com/ndownloader/files/10391952)

**Supplementary Figure. 1.** Scatter plots of the  $\log_{10}$  normalized protein intensities demonstrating the variance of protein expression level between biological replicates. R2 indicates the correlation coefficient between samples. (A) Correlation between sham operated samples. (B) Correlation between 2 DPA samples. (C) Correlation between 7 DPA samples. (D) Correlation between 14 DPA samples.

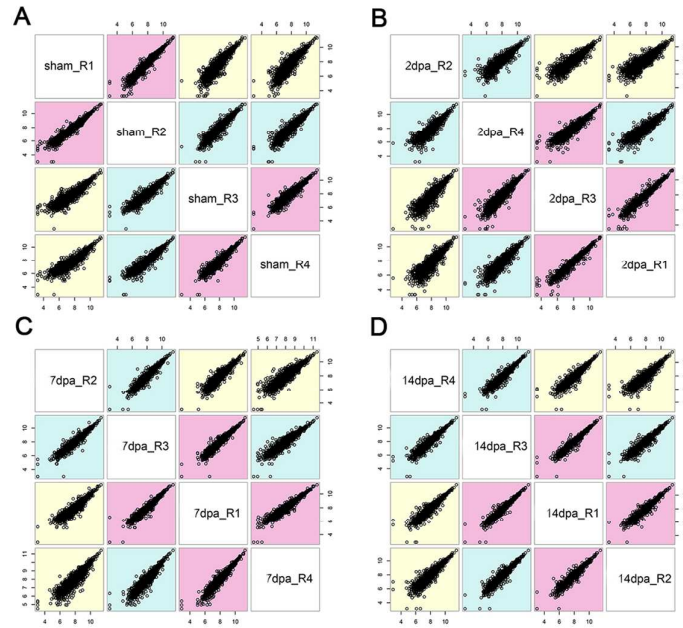

**Supplementary Figure 2.** GO annotation analysis on the 4003 protein groups revealed multiple significantly annotations were enriched. (A) Molecular Function. (B) Biological Process.

Supplementary Figure 2A.

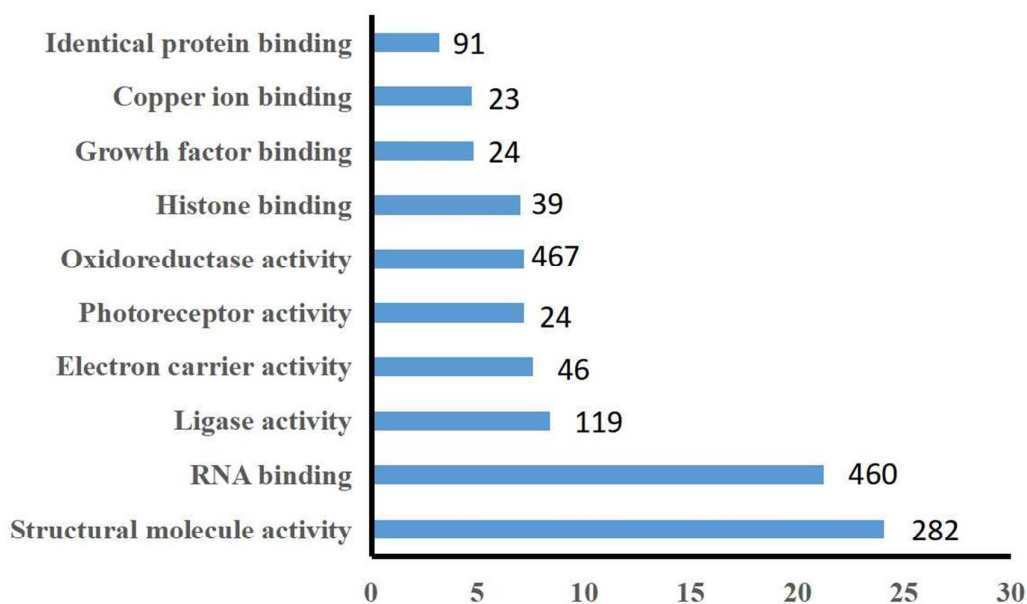

Supplementary Figure 2B.

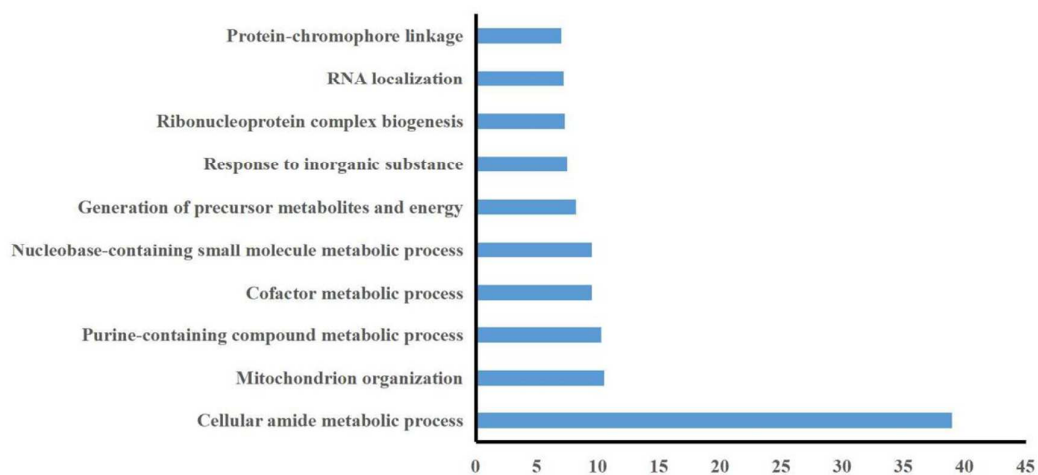

Supplement: Supplementary file 1 [file 10391952]
